# Supplementary material for: Early events in the mechanism of single-source chemical vapor deposition of zirconium and hafnium diboride: a computational investigation
Source: Royal Society of Chemistry journal article supplement (doi:10.1039/d3cp05385g), 2023-12-05
Supplement: d3cp05385g1.pdf [file d3cp05385g1.pdf]

## Supplemental Materials

### Table of Contents

|                                                                                                  |          |
|--------------------------------------------------------------------------------------------------|----------|
| Effects of Spin-Orbit Coupling                                                                   | Page S2  |
| Figure S1: Reaction map of the tetrakis complex.                                                 | Page S4  |
| Figure S2: Reaction map of the cyclopentadienyl complex.                                         | Page S5  |
| Figure S3: Reaction coordinate diagram of the initial reactions of all $Zr(BH_4)_4$ pathways.    | Page S6  |
| Figure S4: Reaction coordinate diagram of the low energy pathway of $Zr(BH_4)_4$ reactions.      | Page S7  |
| Figure S5: Reaction coordinate diagram of the high energy pathway of $Zr(BH_4)_4$ reactions.     | Page S8  |
| Figure S6: Reaction coordinate diagram of the initial reactions of all $CpHf(BH_4)_3$ pathways.  | Page S9  |
| Figure S7: Reaction coordinate diagram of the low energy pathway of $CpHf(BH_4)_3$ reactions.    | Page S10 |
| Figure S8: Reaction coordinate diagram of the high energy pathway of $CpHf(BH_4)_3$ reactions.   | Page S11 |
| Figure S9: Visualization of <b>CpHf-2f</b> structure.                                            | Page S12 |
| Figure S10: Visualization of <b>CpHf-2i</b> structure.                                           | Page S12 |
| Figure S11: Reaction coordinate diagram of the initial reactions of all $CpZr(BH_4)_3$ pathways. | Page S13 |
| Figure S12: Reaction coordinate diagram of the low energy pathway of $CpZr(BH_4)_3$ reactions.   | Page S14 |
| Figure S13: Reaction coordinate diagram of the high energy pathway of $CpZr(BH_4)_3$ reactions.  | Page S15 |

## Effects of Spin-Orbit Coupling

In order to investigate the impact of the heavy-atom effect on the calculated reaction path, spin-orbit coupling (SOC) has been calculated as a correction to the ground state energy. These corrections, derived from single-point calculations using the ORCA 5.0.3 quantum chemistry program<sup>1</sup>, are presented in Table S1. For this purpose, an all-electron approach was necessary as opposed to the use of effective core potential to describe the core-electron of the heavy-atoms.

In the calculation, the PBE0 hybrid functional<sup>2</sup> and D3(BJ) dispersion correction<sup>3,4</sup> were employed. The scalar relativistic effects were accounted for using the zeroth-order regular approximation<sup>5,6</sup> (ZORA) and the relativistically recontracted ZORA-TZVP basis set<sup>7</sup> was applied to hydrogen, boron and carbon atoms. The segmented all-electron relativistically contracted SARC-ZORA-TZVP basis set<sup>8,9</sup> was applied to zirconium and hafnium centers. The structures were not re-optimized. Ten singlet and ten triplet excited states were calculated with linear-response time-dependent density functional theory<sup>10</sup> (LR-TDDFT) using the closed-shell ground state as the reference state. The spin-orbit coupling operator was calculated by the SOMF-(1X)<sup>11</sup> approach implemented in ORCA. The RIJCOSX algorithm was used throughout to accelerate the calculations.

It was observed that the spin-orbit coupling was trivial to the reaction path. Despite some inconsistencies arising from the use of a different method and the fact that the geometries were not re-optimized, it is reasonable to conclude that the inclusion of spin-orbit coupling does not significantly alter the favored reaction paths identified in the main text.

| SOC correction | cm <sup>-1</sup> | kcal·mol <sup>-1</sup> |
|----------------|------------------|------------------------|
| CpHf-1a        | -7.7             | -0.022                 |
| CpHf-1a-TS-2a  | -19.4            | -0.055                 |
| CpHf-1b        | -45.6            | -0.130                 |
| CpHf-2a        | -40.0            | -0.114                 |
| CpHf-2a-TS-2f  | -69.7            | -0.199                 |
| CpZr-1a        | -0.6             | -0.002                 |
| CpZr-1a-TS-2a  | -1.2             | -0.003                 |
| CpZr-1b        | -2.9             | -0.008                 |
| CpZr-2a        | -2.6             | -0.007                 |
| CpZr-2a-TS-2f  | -3.9             | -0.011                 |

| SOC correction | cm <sup>-1</sup> | kcal·mol <sup>-1</sup> |
|----------------|------------------|------------------------|
| CpZr-2a-TS-3a  | -3.1             | -0.009                 |
| CpZr-2f        | -1.0             | -0.003                 |
| CpZr-3a        | -4.6             | -0.013                 |
| Hf-1a          | -0.2             | -0.001                 |
| Hf-1a-TS-2a    | -23.3            | -0.067                 |
| Hf-1b          | -53.7            | -0.153                 |
| Hf-2a          | -44.6            | -0.127                 |
| Hf-2a-TS-2f    | -47.3            | -0.135                 |
| Hf-2a-TS-3a    | -76.3            | -0.218                 |
| Hf-2f          | -13.5            | -0.039                 |

| SOC correction | cm <sup>-1</sup> | kcal·mol <sup>-1</sup> |
|----------------|------------------|------------------------|
| Hf-3a          | -104.3           | -0.298                 |
| Zr-1a          | 0.0              | 0.000                  |
| Zr-1a-TS-2a    | -1.7             | -0.005                 |
| Zr-1b          | -3.4             | -0.010                 |
| Zr-2a          | -2.8             | -0.008                 |

| SOC correction | cm <sup>-1</sup> | kcal·mol <sup>-1</sup> |
|----------------|------------------|------------------------|
| Zr-2a-TS-2f    | -3.4             | -0.010                 |
| Zr-2a-TS-3a    | -4.5             | -0.013                 |
| Zr-2f          | -1.0             | -0.003                 |
| Zr-3a          | -5.6             | -0.016                 |

Table S1. Spin orbit coupling corrections to the ground state energy of selected geometries.

### References

- 1 F. Neese, F. Wennmohs, U. Becker and C. Riplinger, *J Chem Phys*, 2020, **152**, 224108.
- 2 C. Adamo and V. Barone, *J Chem Phys*, 1999, **110**, 6158–6170.
- 3 S. Grimme, J. Antony, S. Ehrlich and H. Krieg, *J Chem Phys*, 2010, **132**, 154104.
- 4 S. Grimme, S. Ehrlich and L. Goerigk, *J Comput Chem*, 2011, **32**, 1456–1465.
- 5 E. van Lenthe, E. J. Baerends and J. G. Snijders, *J Chem Phys*, 1993, **99**, 4597–4610.
- 6 C. van Wüllen, *J Chem Phys*, 1998, **109**, 392–399.
- 7 A. Canal Neto, I. B. Ferreira, F. E. Jorge and A. Z. de Oliveira, *Chem Phys Lett*, 2021, **771**, 138548.
- 8 D. A. Pantazis, X.-Y. Chen, C. R. Landis and F. Neese, *J Chem Theory Comput*, 2008, **4**, 908–919.
- 9 J. D. Rolfes, F. Neese and D. A. Pantazis, *J Comput Chem*, 2020, **41**, 1842–1849.
- 10 R. Bauernschmitt and R. Ahlrichs, *Chem Phys Lett*, 1996, **256**, 454–464.
- 11 F. Neese, *J Chem Phys*, 2005, **122**, 034107.

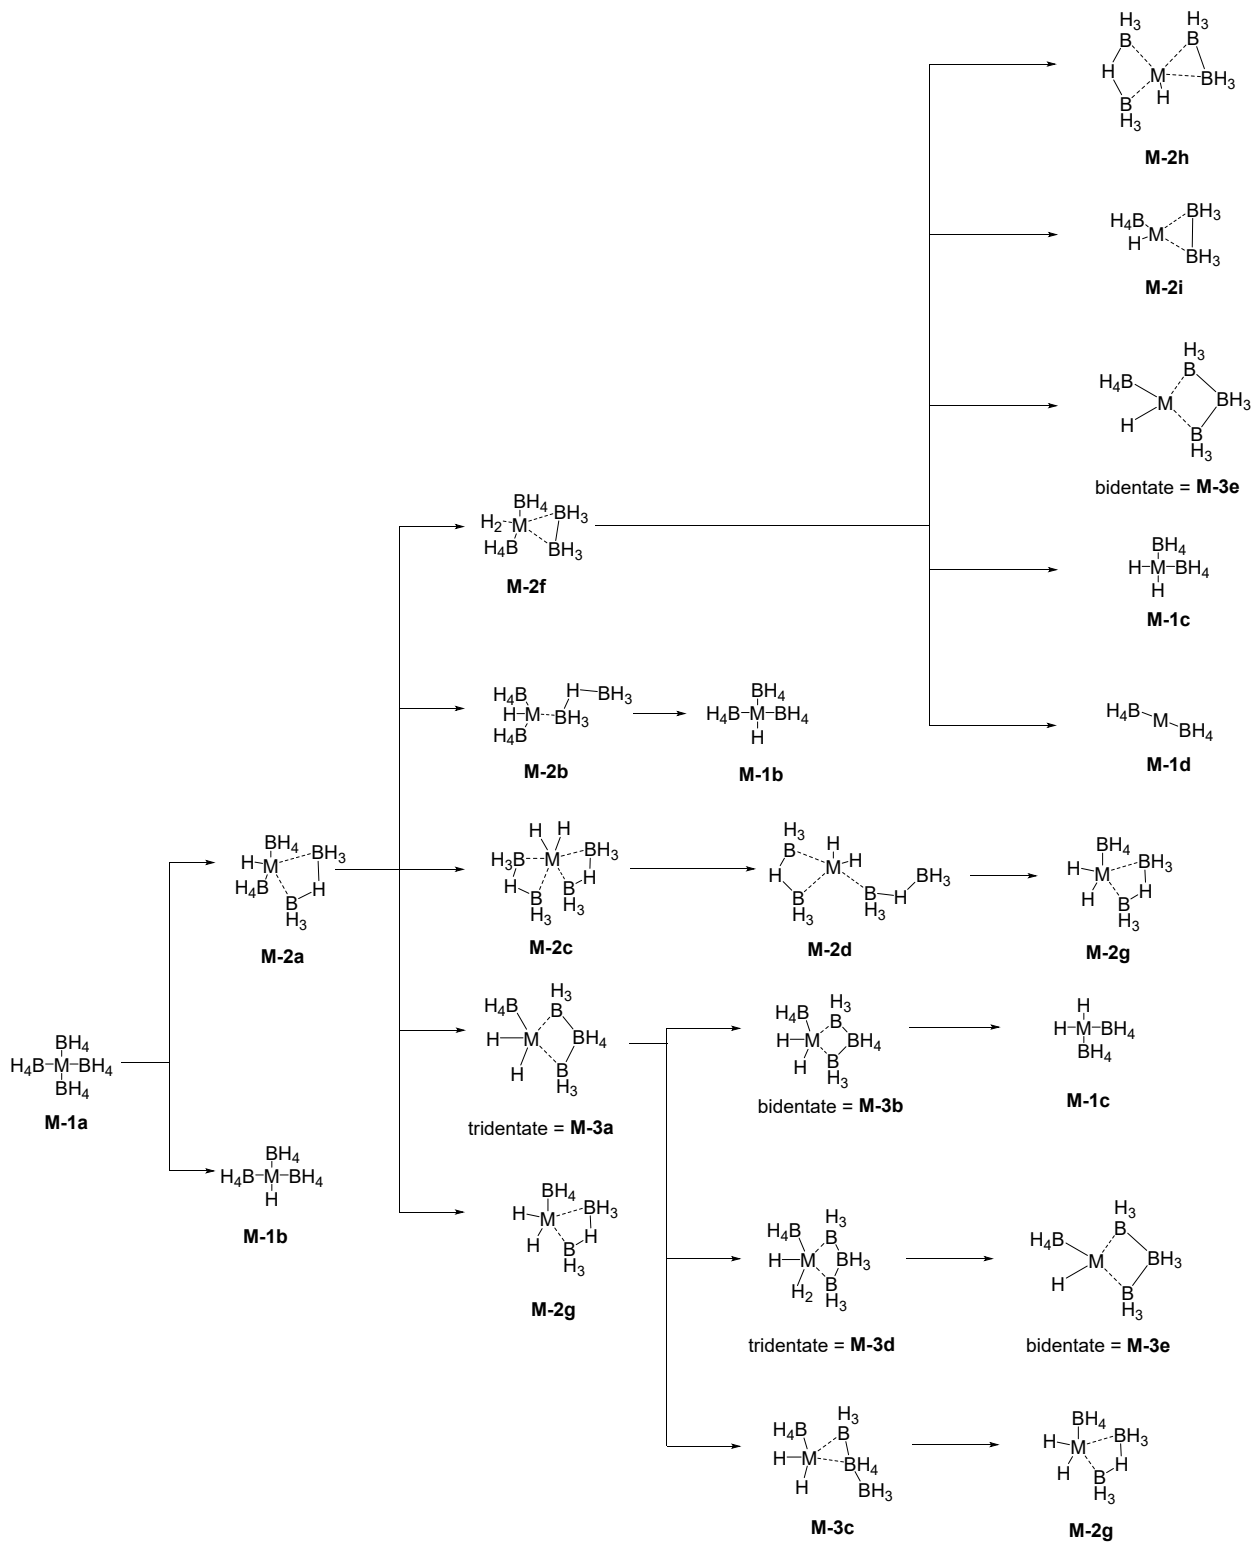

Figure S1: Reaction map of the tetrakis complex.  $M = \text{Zr}, \text{Hf}$ .

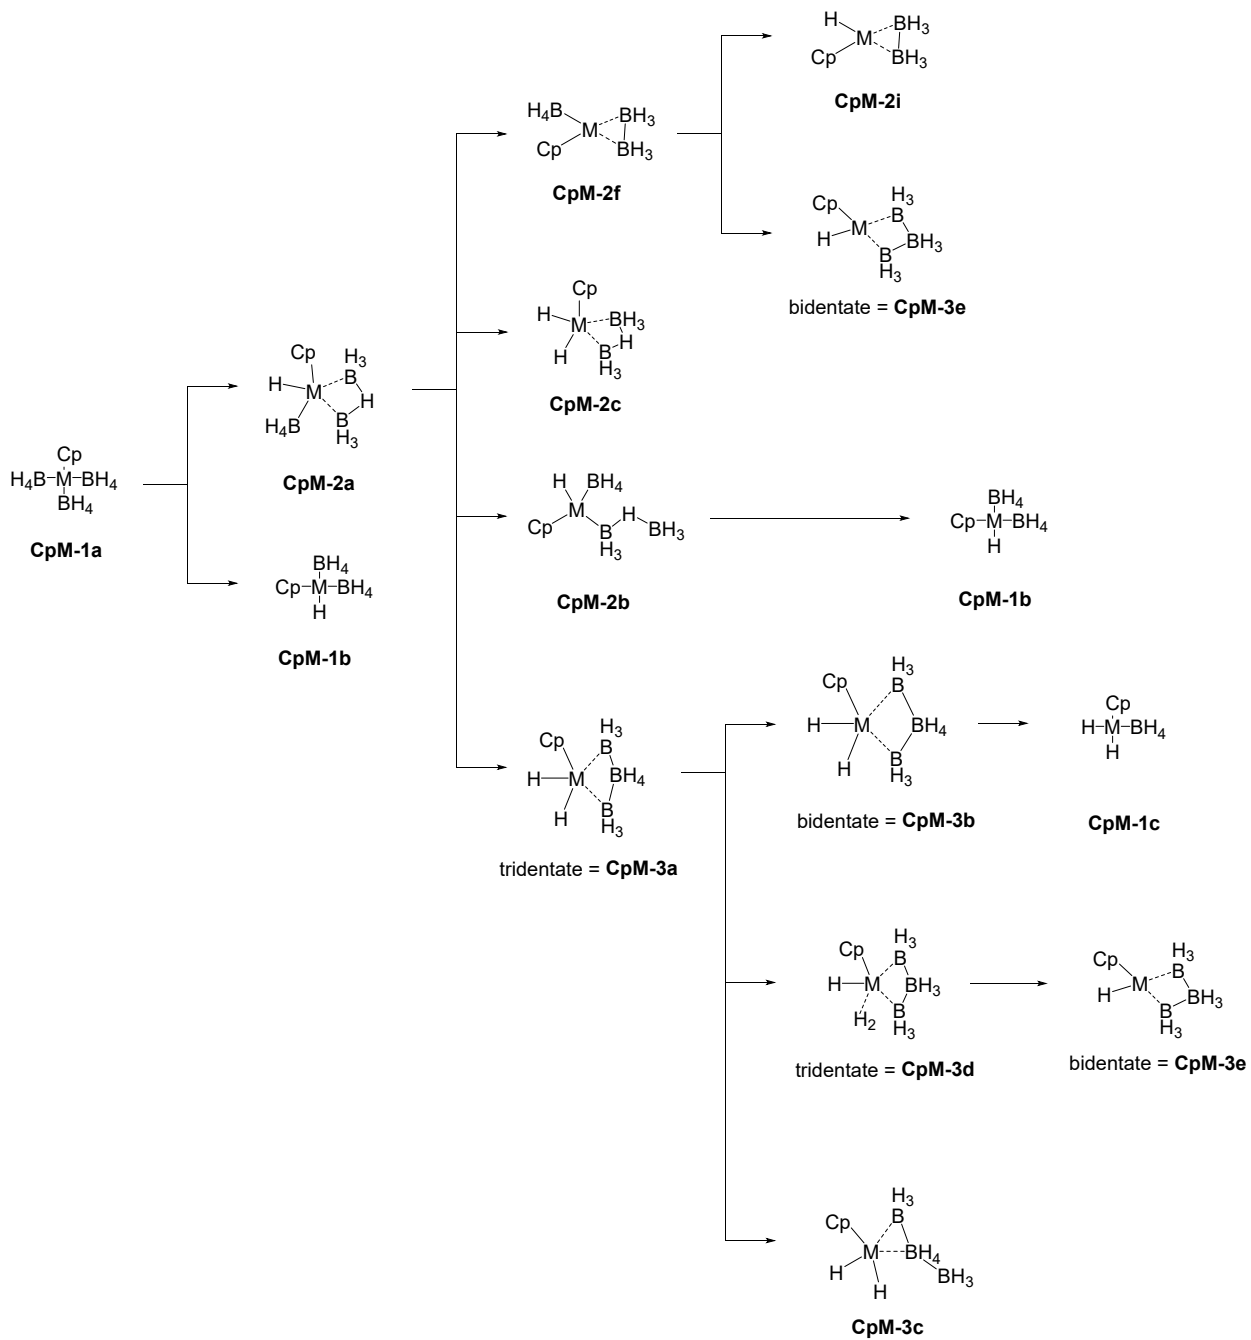

Figure S2: Reaction map of the cyclopentadienyl complex.  $M = \text{Zr}, \text{Hf}$ .

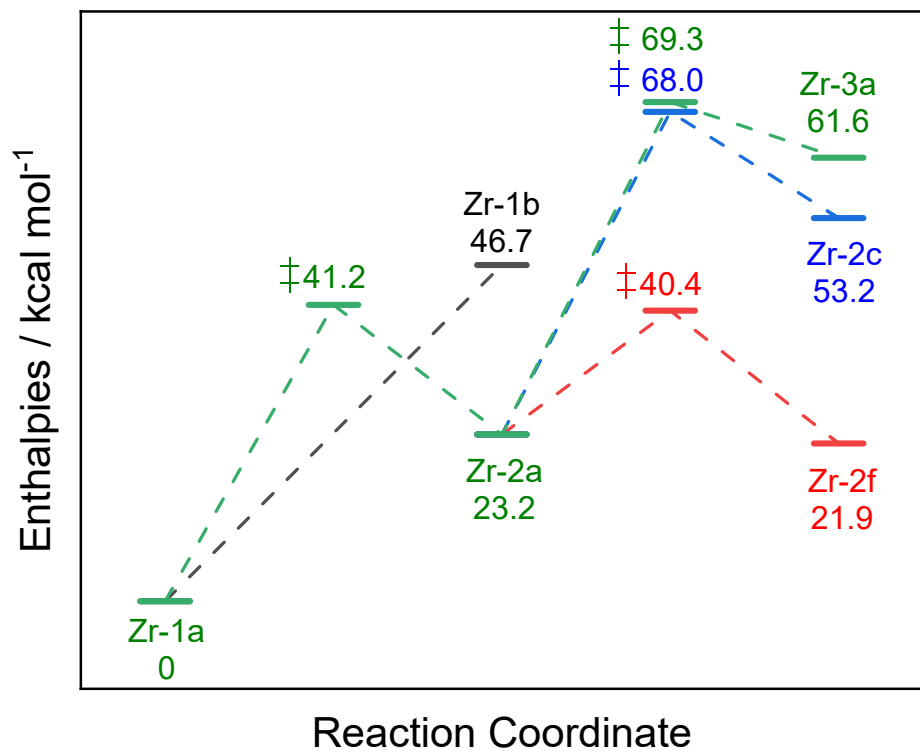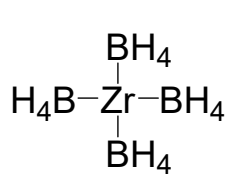

**Zr-1a**

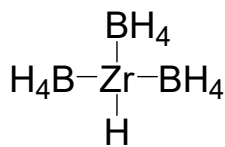

**Zr-1b**

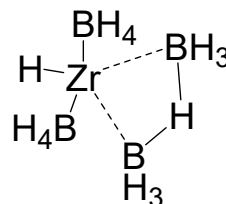

**Zr-2a**

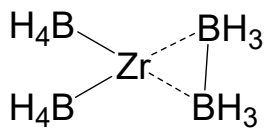

**Zr-2f**

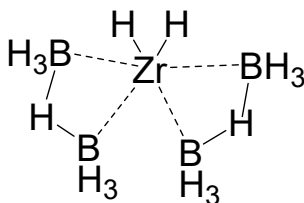

**Zr-2c**

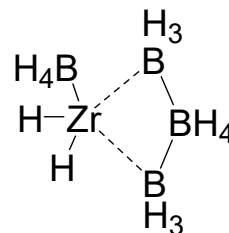

tridentate = **Zr-3a**

Figure S3: Reaction coordinate diagram of the initial reactions of all  $\text{Zr}(\text{BH}_4)_4$  pathways. All enthalpies were calculated at 298.15 K.

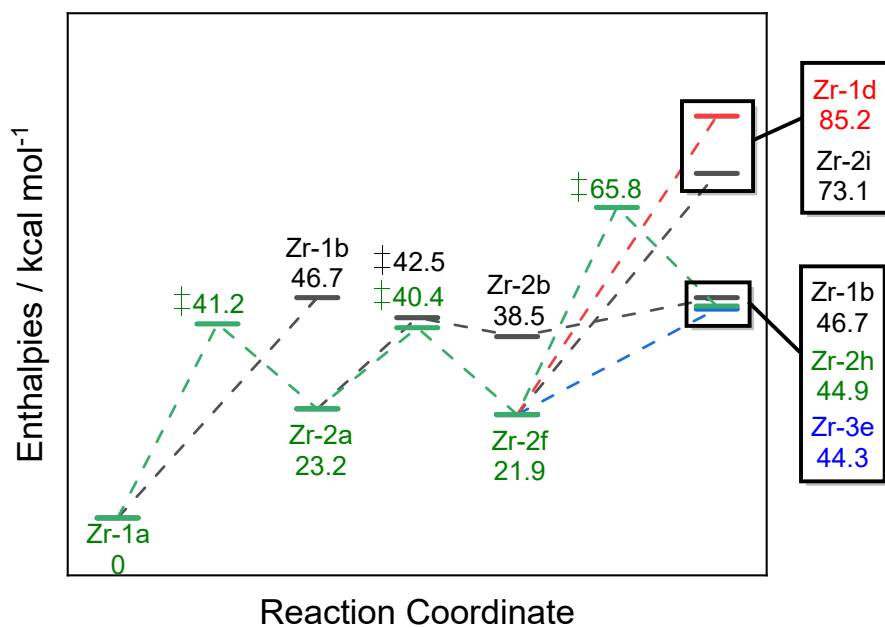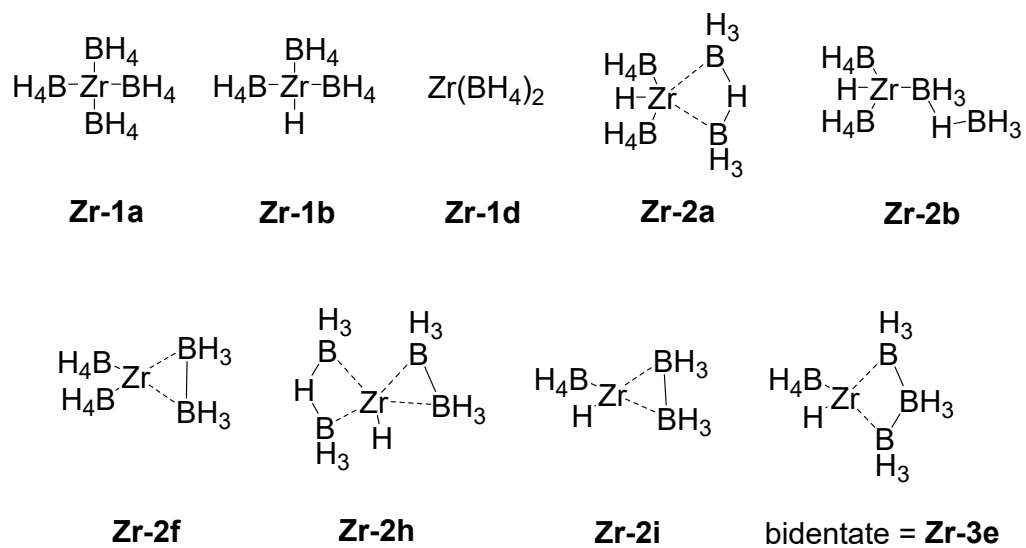

Figure S4: Reaction coordinate diagram of the low energy pathway of  $\text{Zr}(\text{BH}_4)_4$  reactions. All enthalpies were calculated at 298.15 K.

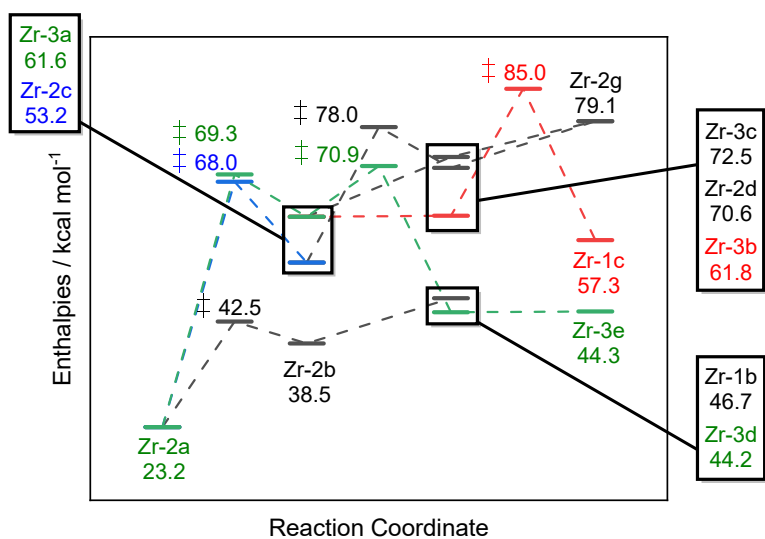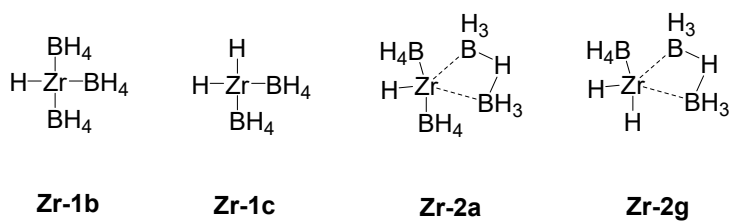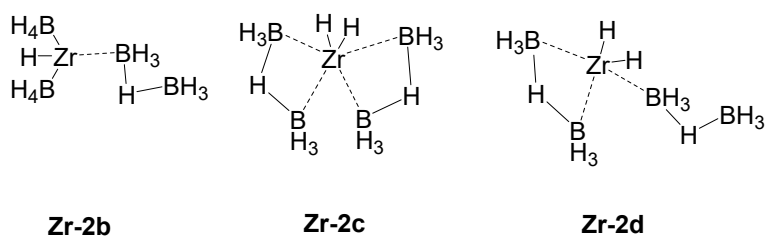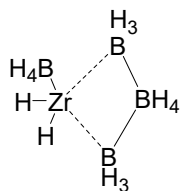

tridentate = **Zr-3a**

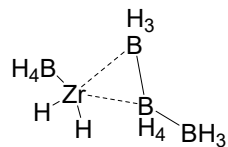

**Zr-3c**

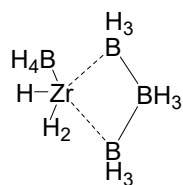

tridentate = **Zr-3d**

bidentate = **Zr-3b**

bidentate = **Zr-3e**  
(lose H<sub>2</sub>)

Figure S5: Reaction coordinate diagram of the high energy pathway of Zr(BH<sub>4</sub>)<sub>4</sub> reactions. All enthalpies were calculated at 298.15 K.



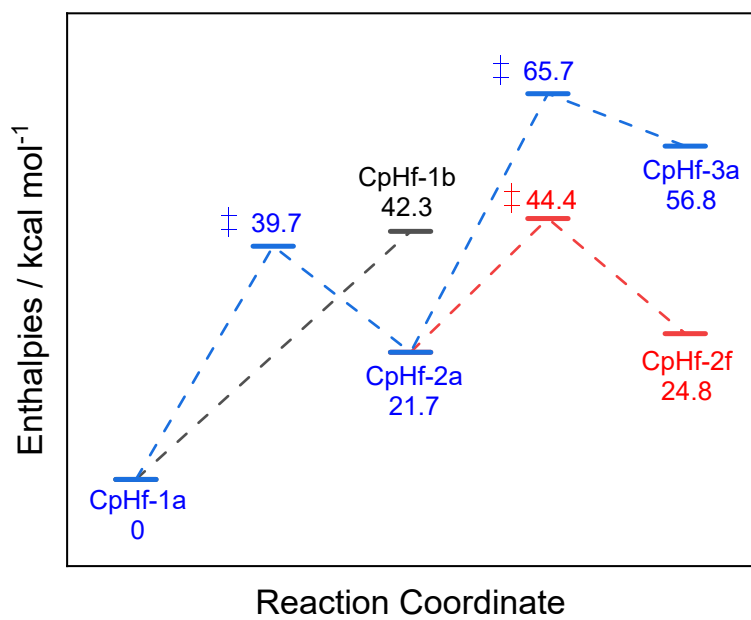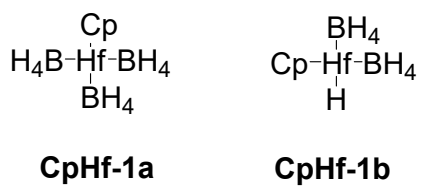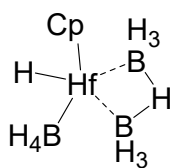

**CpHf-2a**

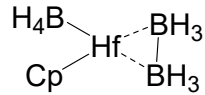

**CpHf-2f**

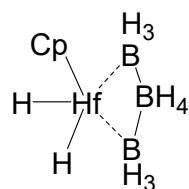

tridentate = **CpHf-3a**

Figure S6: Reaction coordinate diagram of the initial reactions of all CpHf(BH<sub>4</sub>)<sub>3</sub> pathways. All enthalpies were calculated at 298.15 K.

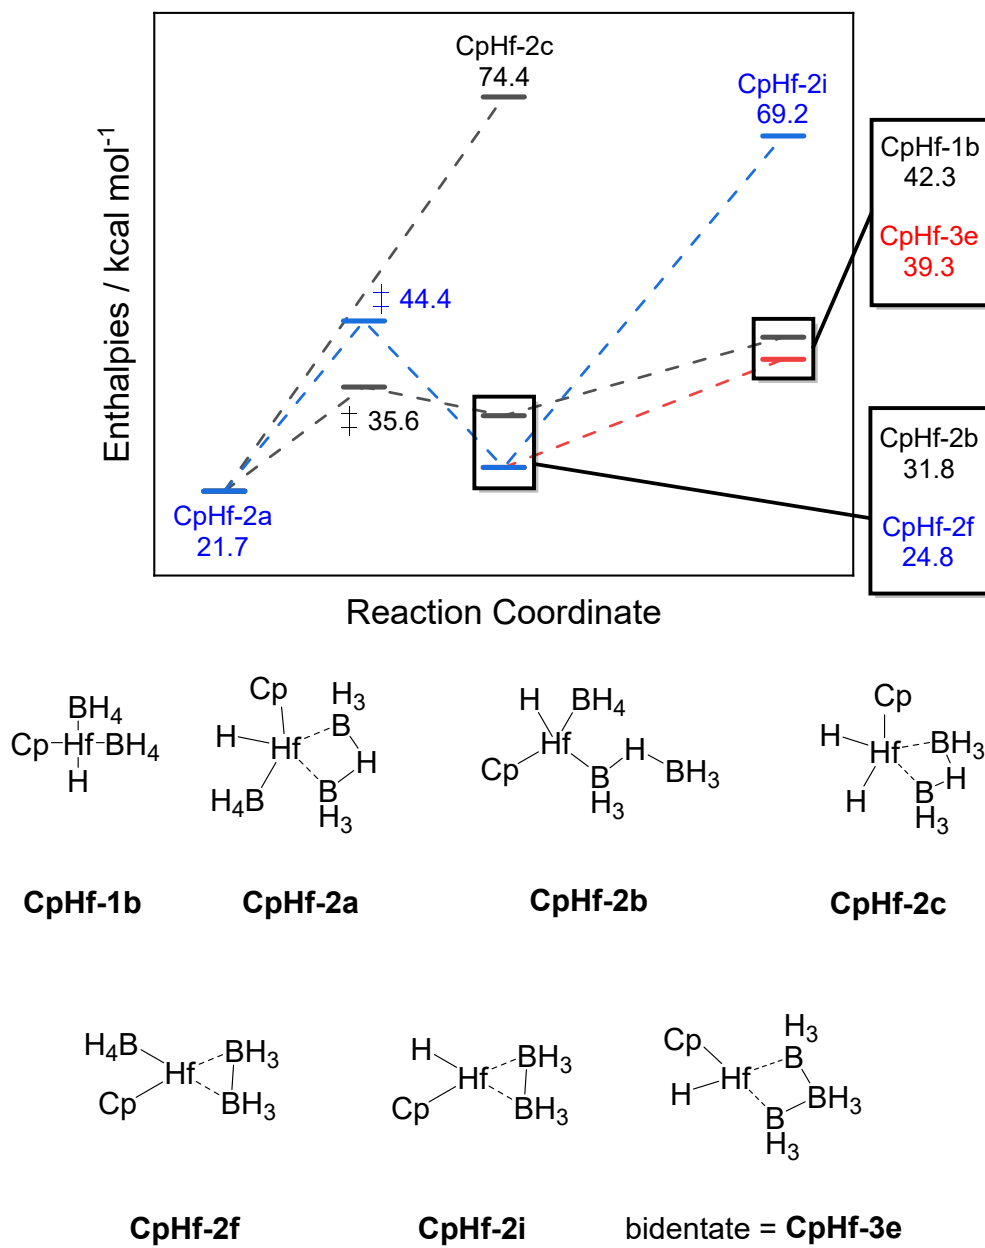

Figure S7: Reaction coordinate diagram of the low energy pathway of CpHf(BH<sub>4</sub>)<sub>3</sub> reactions. All enthalpies were calculated at 298.15 K.

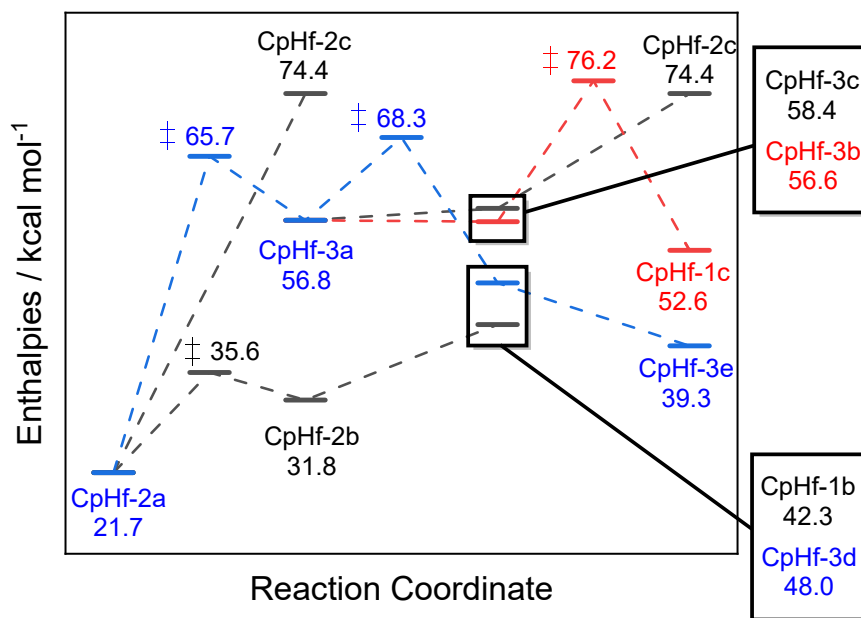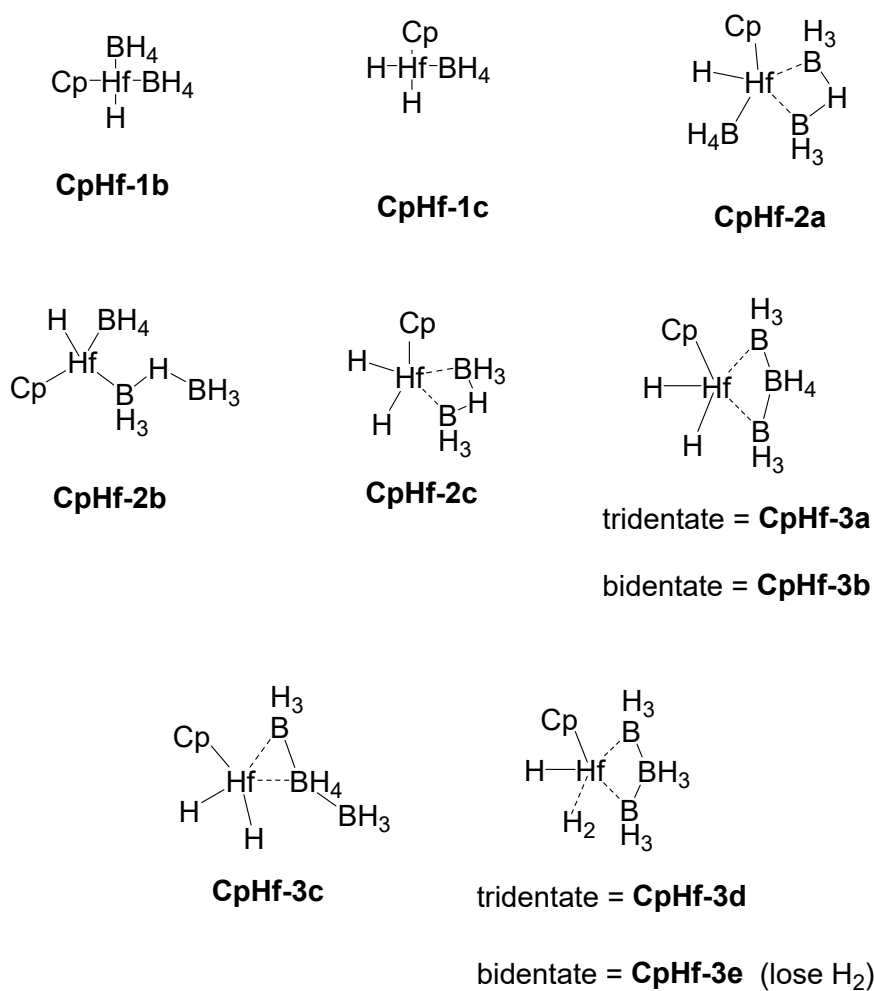

Figure S8: Reaction coordinate diagram of the high energy pathway of CpHf(BH<sub>4</sub>)<sub>3</sub> reactions. All enthalpies were calculated at 298.15 K.

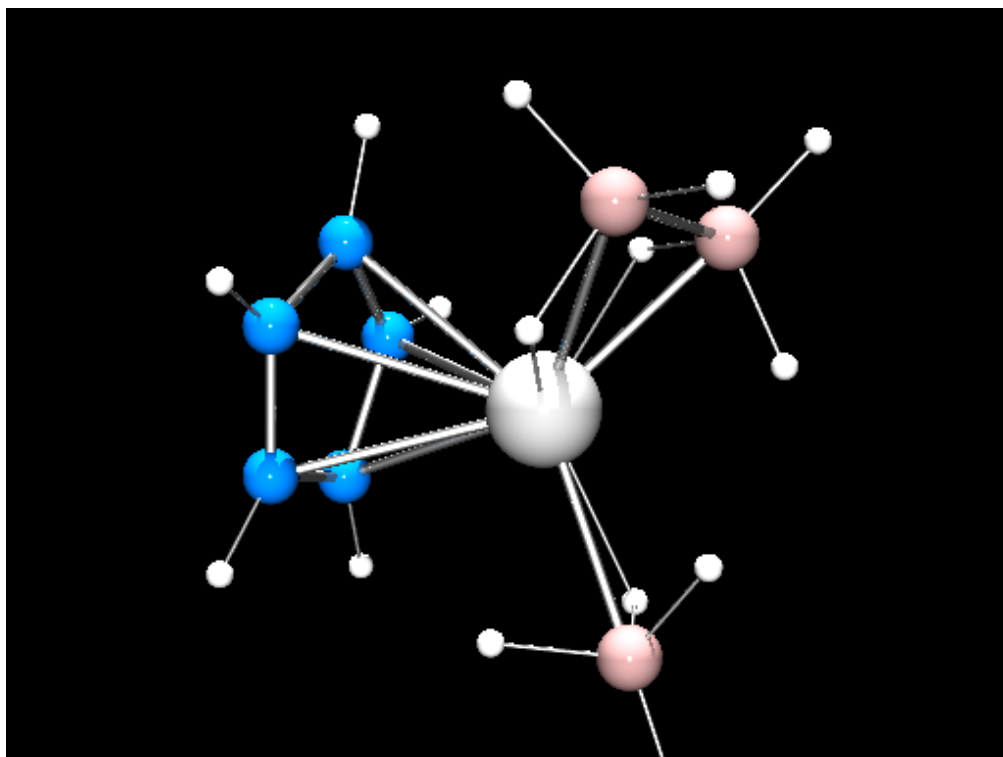

Figure S9: Visualization of **CpHf-2f** structure - note gauche conformation of the  $B_2H_6$  ligand.

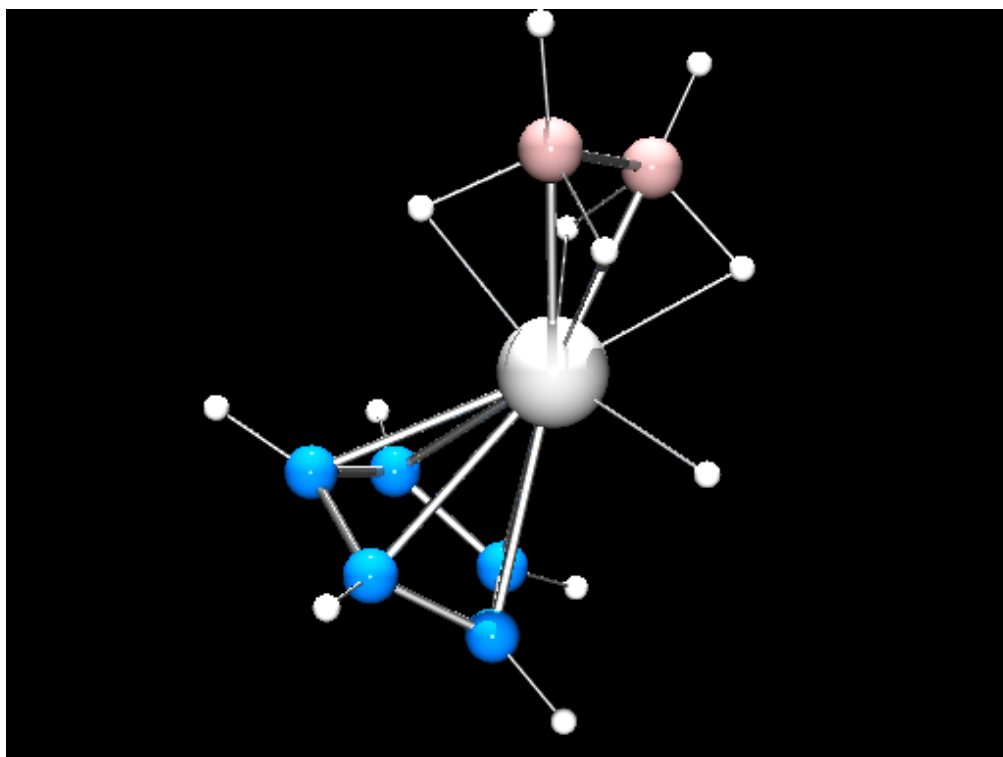

Figure S10: Visualization of **CpHf-2i** structure. Note eclipsed conformation of  $B_2H_6$  ligand.

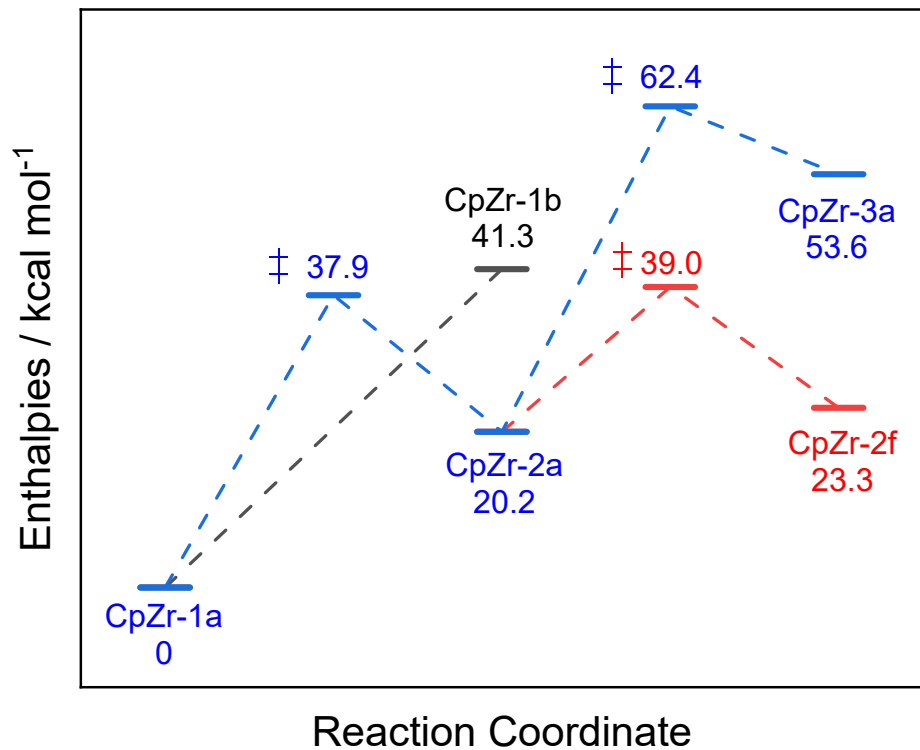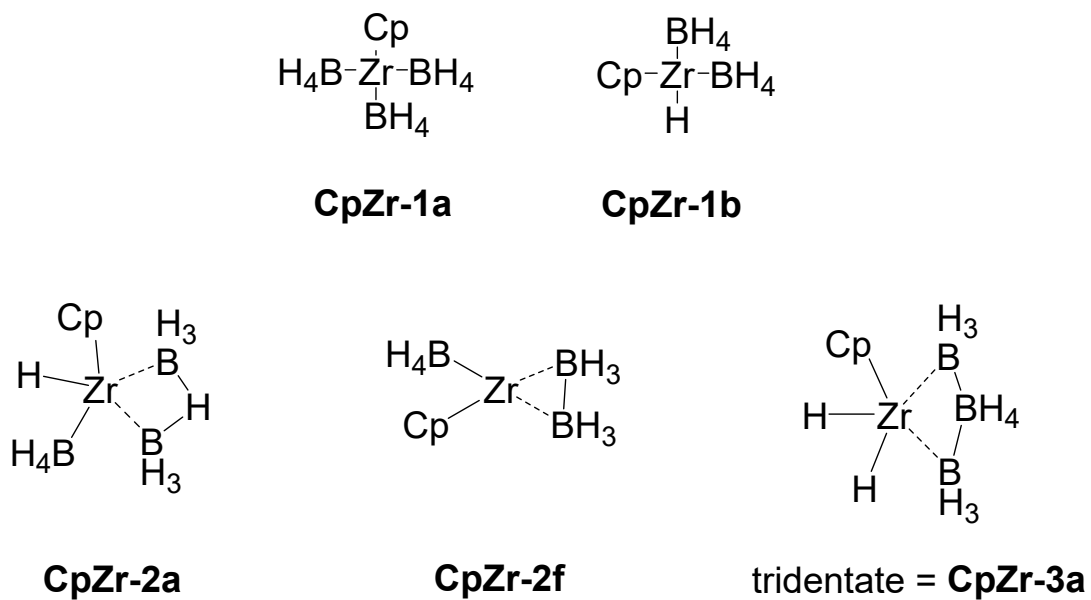

Figure S11: Reaction coordinate diagram of the initial reactions of all CpZr(BH<sub>4</sub>)<sub>3</sub> pathways. All enthalpies were calculated at 298.15 K.

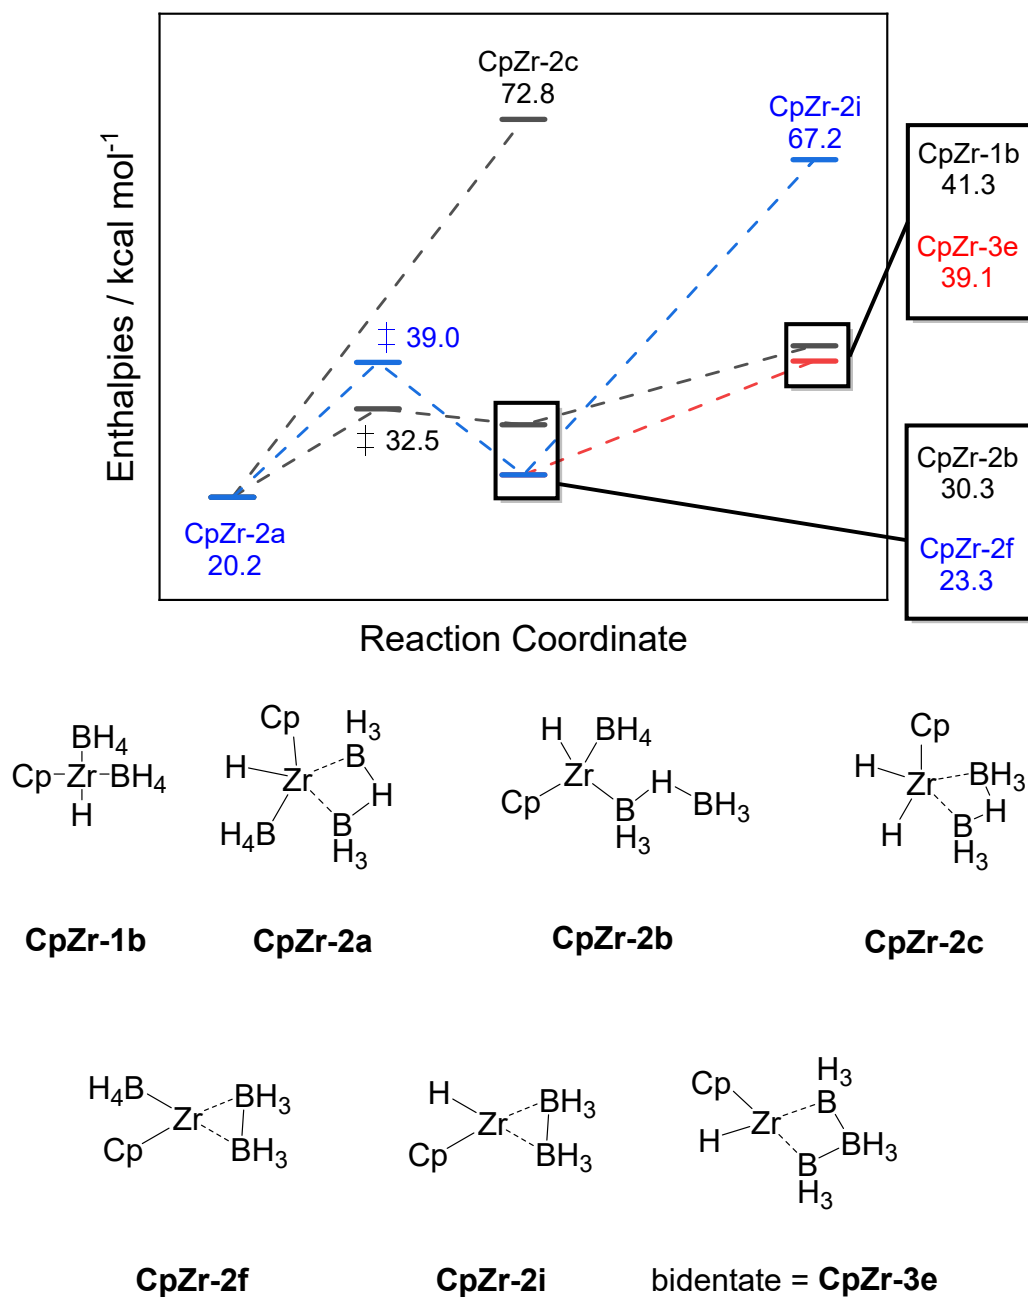

Figure S12: Reaction coordinate diagram of the low energy pathway of CpZr(BH<sub>4</sub>)<sub>3</sub> reactions. All enthalpies were calculated at 298.15 K.

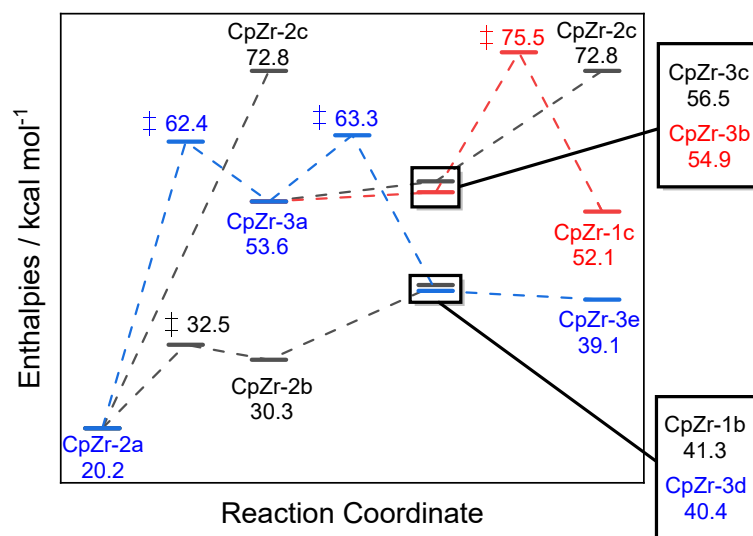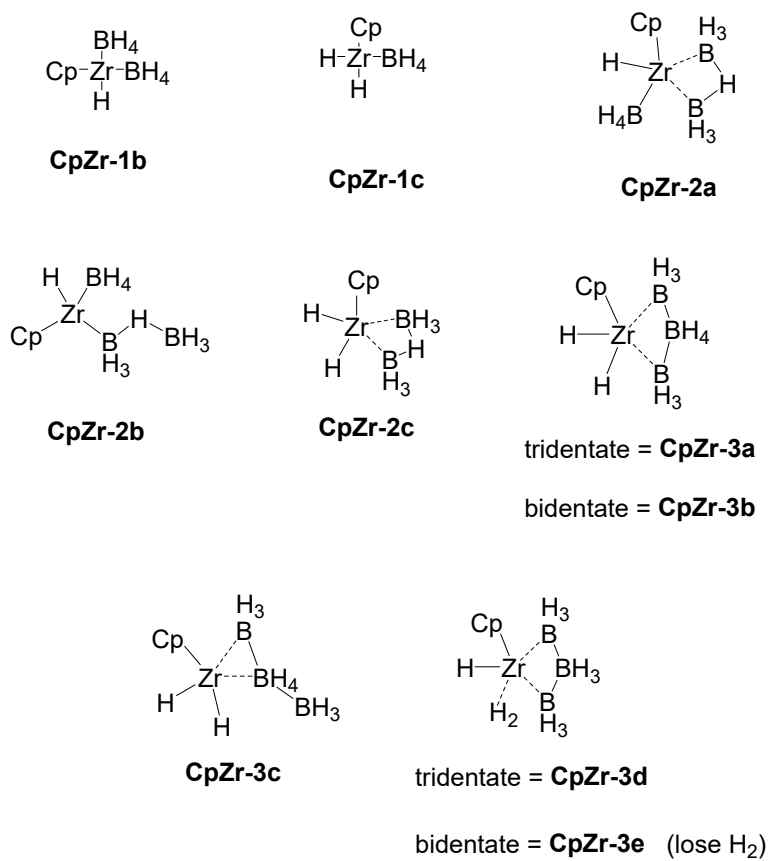

Figure S13: Reaction coordinate diagram of the high energy pathway of CpZr(BH<sub>4</sub>)<sub>3</sub> reactions. All enthalpies were calculated at 298.15 K.
